# Supplementary material for: Evaluation of a Multivalent Transcriptomic Metric for Diagnosing Surgical Sepsis and Estimating Mortality Among Critically Ill Patients
Source: PubMed Central journal article supplement (PMC9277492; doi:10.1001/jamanetworkopen.2022.21520), 2022-07-12
Supplement: jamanetwopen-e2221520-s001.pdf [file jamanetwopen-e2221520-s001.pdf]

## Supplementary Online Content

Brakenridge SC, Chen UI, Loftus T, et al. Evaluation of a multivalent transcriptomic metric for diagnosing surgical sepsis and estimating mortality among critically ill patients. *JAMA Netw Open*. 2022;5(7):e2221520. doi:10.1001/jamanetworkopen.2022.21520

**eTable 1.** List of Genes Used in the IMX Transcriptomic Metric

**eFigure 1.** AUROC Figures of Discrimination of Bacterial Infection for IMX-BVN-3 and Procalcitonin and IL-6 Levels

**eFigure 2.** AUROC Figures of Discrimination of 30-Day Mortality for IMX-BVN-3 and Procalcitonin and IL-6 Levels

**eTable 2.** Sensitivity, Specificity, and Odds Ratios for the Various Tests and Models

**eFigure 3.** Linear Mixed-Effects Modeling of IMX-BVN-3 Scores Over Time in the Patients With Sepsis (Cohort A [Blue]) and Patients at Risk of Sepsis (Cohort B [Red])

**eFigure 4.** Linear Mixed-Effects Modeling of IMX-SEV-3 Scores in Patients With Those Dead (Blue Lines) and Alive (Red Lines) at 30 Days

**eFigure 5.** A Framework for Using IMX-SEV-3 Severity Scores to Further Stratify Risk for 30-day Mortality

**eTable 3.** Spearman Correlation Coefficients for the Total Cohort at Day 0 and Total Samples

This supplementary material has been provided by the authors to give readers additional information about their work.

**eTable 1. List of Genes Used in the IMX Transcriptomic Metric**

| <b>Gene ID</b> | <b>Name</b>                                                             |
|----------------|-------------------------------------------------------------------------|
| <i>ARG1</i>    | Arginase 1                                                              |
| <i>BATF</i>    | Basic leucine zipper transcription factor, ATF-like                     |
| <i>C3AR1</i>   | Complement component 3a receptor 1                                      |
| <i>CD163</i>   | High affinity scavenger receptor for the hemoglobin-haptoglobin complex |
| <i>CEACAM1</i> | CEA Cell Adhesion Molecule 1                                            |
| <i>CTSB</i>    | Cathepsin B                                                             |
| <i>CTSL</i>    | Cathepsin L1                                                            |
| <i>DEFA4</i>   | Defensin alpha 4                                                        |
| <i>FAM214A</i> | Family with sequence similarity 214 member A                            |
| <i>FURIN</i>   | Furin, paired basic amino acid cleaving enzyme                          |
| <i>GAD45A</i>  | Growth arrest and DNA damage, 45A                                       |
| <i>GNA15</i>   | G protein subunit alpha 15                                              |
| <i>HK3</i>     | Hexokinase isoform 3                                                    |
| <i>HLADMB</i>  | Major Histocompatibility Complex, Class II, DM Beta                     |
| <i>IFI27</i>   | Interferon alpha inducible protein 27                                   |
| <i>ISG15</i>   | Ubiquitin-like modifier/interferon stimulated gene 15                   |
| <i>JUP</i>     | Junction plakoglobin                                                    |
| <i>KCNJ2</i>   | Potassium inwardly rectifying channel subfamily J member 2              |
| <i>LY86</i>    | Lymphocyte antigen 86                                                   |
| <i>NMRK1</i>   | Nicotinamide riboside kinase 1                                          |
| <i>OASL</i>    | 2,5 Oligoadenylate synthetase 1                                         |
| <i>OLFM4</i>   | Olfactomedin 4                                                          |
| <i>PDE4B</i>   | Phosphodiesterase 4B                                                    |
| <i>PER1</i>    | Period circadian regulator 1                                            |
| <i>PSMB9</i>   | Proteasome 20S subunit beta 9                                           |
| <i>RAPGEF1</i> | Rap guanine nucleotide exchange factor 1                                |
| <i>S100A12</i> | S100 calcium binding protein A12                                        |
| <i>TGFBI</i>   | Transforming growth factor B induced                                    |
| <i>ZDHHC19</i> | Zinc finger DHHC-type palmitoyltransferase 19                           |

# eFigure 1. AUROC Figures of Discrimination of Bacterial Infection for IMX-BVN-3 and Procalcitonin and IL-6 Levels

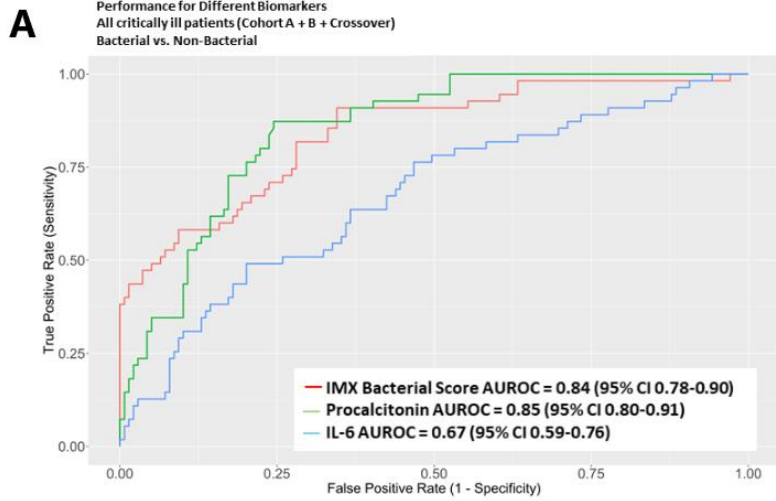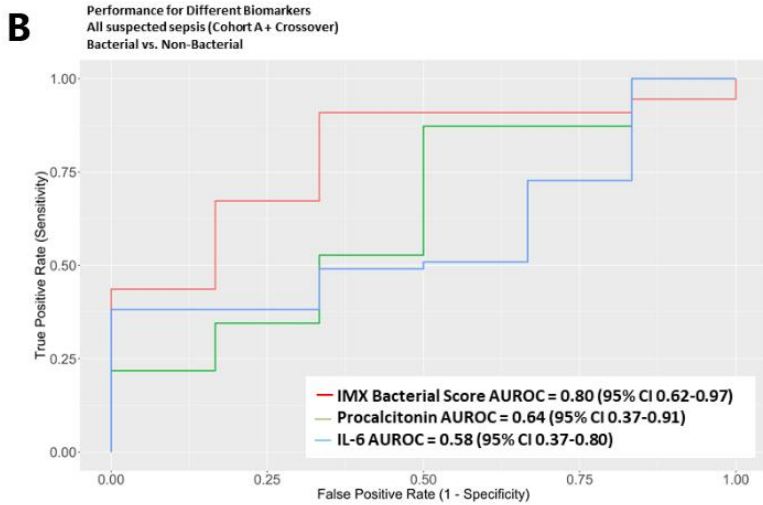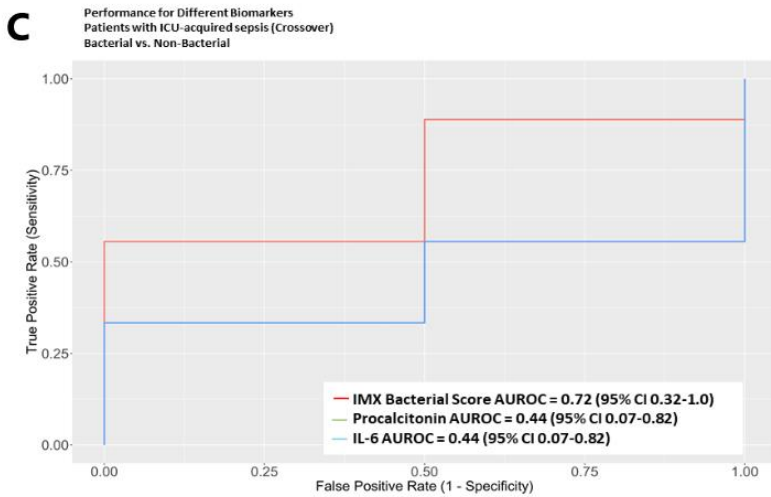

Panel A: all critically ill study patients (Cohort A + B + Crossover). Panel B: all patients with suspected sepsis (Cohort A + Crossover). Panel C: Cohort B “crossover” patients with hospital-acquired sepsis.

## eFigure 2. AUROC Figures of Discrimination of 30-Day Mortality for IMX-BVN-3 and Procalcitonin and IL-6 Levels

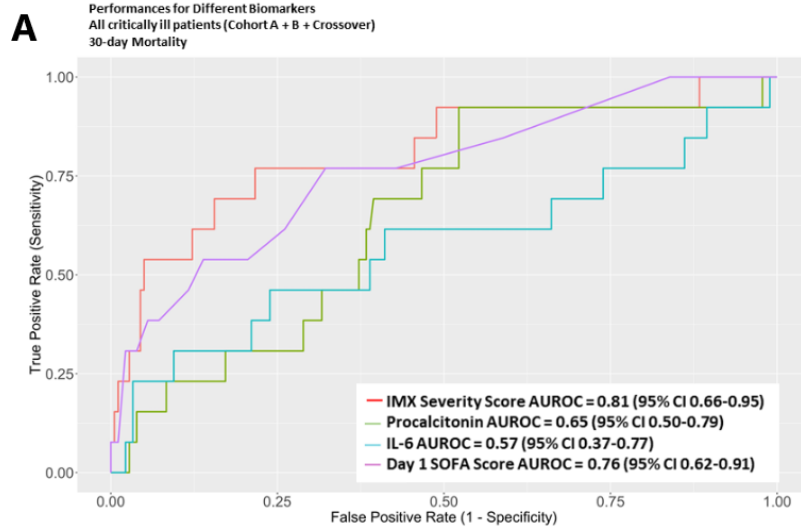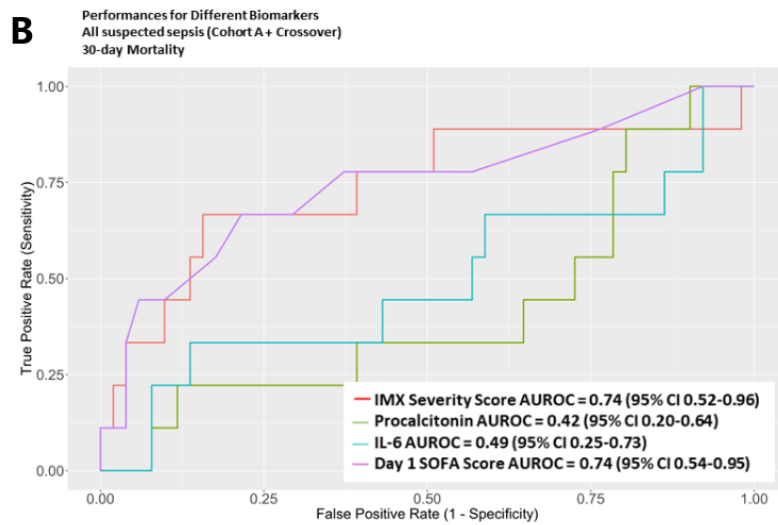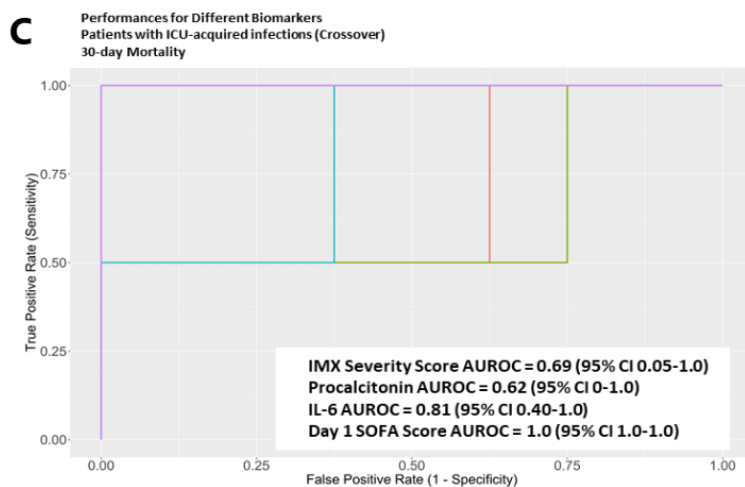

Panel A: all critically ill study patients (Cohort A + B + Crossover). Panel B: all patients with suspected sepsis (Cohort A + Crossover). Panel C: Cohort B “crossover” patients with hospital-acquired sepsis.

**eTable 2. Sensitivity, Specificity, and Odds Ratios for the Various Tests and Models**  
 Panel A. Performance for bacterial infection (A1, IMX-BVN-3; A2, procalcitonin, A3, IL-6; A4, CRP; A5, CBC; A6, PMN:ALC). Panel B. Performance for severity (IMX-SEV-3).

**A(1)**

**IMX-BVN-3**

**Total Subjects**

|                         | Bacterial infection |    | % in band | Sensitivity | Specificity | LR    |
|-------------------------|---------------------|----|-----------|-------------|-------------|-------|
|                         | Yes                 | No |           |             |             |       |
| Very likely bacterial   | 35                  | 27 | 0.315     | 0.636       | 0.810       | 3.347 |
| Possibly bacterial      | 17                  | 59 | 0.386     | 0.309       | 0.585       | 0.744 |
| Unlikely bacterial      | 3                   | 53 | 0.284     | 0.945       | 0.373       | 0.146 |
| Very unlikely bacterial | 0                   | 3  | 0.015     | 1.000       | 0.021       | 0.000 |

**Cohort A**

|                         | Bacterial infection |    | % in band | Sensitivity | Specificity | LR    |
|-------------------------|---------------------|----|-----------|-------------|-------------|-------|
|                         | Yes                 | No |           |             |             |       |
| Very likely bacterial   | 30                  | 2  | 0.627     | 0.652       | 0.600       | 1.630 |
| Possibly bacterial      | 14                  | 3  | 0.333     | 0.304       | 0.400       | 0.507 |
| Unlikely bacterial      | 2                   | 0  | 0.039     | 0.957       | 0.000       | Inf   |
| Very unlikely bacterial | 0                   | 0  | 0         | 1.000       | 0.000       | NaN   |

**Cohort A + Crossover Cohort**

|                         | Bacterial infection |    | % in band | Sensitivity | Specificity | LR    |
|-------------------------|---------------------|----|-----------|-------------|-------------|-------|
|                         | Yes                 | No |           |             |             |       |
| Very likely bacterial   | 35                  | 2  | 0.597     | 0.636       | 0.714       | 2.227 |
| Possibly bacterial      | 17                  | 4  | 0.339     | 0.309       | 0.429       | 0.541 |
| Unlikely bacterial      | 3                   | 1  | 0.065     | 0.945       | 0.143       | 0.382 |
| Very unlikely bacterial | 0                   | 0  | 0         | 1.000       | 0.000       | NaN   |

**Crossover Cohort**

|                         | Bacterial infection |    | % in band | Sensitivity | Specificity | LR    |
|-------------------------|---------------------|----|-----------|-------------|-------------|-------|
|                         | Yes                 | No |           |             |             |       |
| Very likely bacterial   | 5                   | 0  | 0.455     | 0.556       | 1           | Inf   |
| Possibly bacterial      | 3                   | 1  | 0.364     | 0.333       | 0.5         | 0.667 |
| Unlikely bacterial      | 1                   | 1  | 0.182     | 0.889       | 0.5         | 0.222 |
| Very unlikely bacterial | 0                   | 0  | 0         | 1           | 0           | -     |

**A(2)**

## Procalcitonin

### Total Subjects

|                              | Bacterial infection |    | % in band | Sensitivity | Specificity | LR    |
|------------------------------|---------------------|----|-----------|-------------|-------------|-------|
|                              | Yes                 | No |           |             |             |       |
| PCT > 0.5 ng/mL              | 40                  | 27 | 0.345     | 0.727       | 0.806       | 3.744 |
| 0.25 ng/mL < PCT ≤ 0.5 ng/mL | 8                   | 20 | 0.144     | 0.145       | 0.856       | 1.011 |
| 0.1 ng/mL < PCT ≤ 0.25 ng/mL | 7                   | 41 | 0.247     | 0.873       | 0.295       | 0.431 |
| PCT ≤ 0.1 ng/mL              | 0                   | 51 | 0.263     | 1.000       | 0.367       | 0.000 |

### Cohort A

|                              | Bacterial infection |    | % in band | Sensitivity | Specificity | LR    |
|------------------------------|---------------------|----|-----------|-------------|-------------|-------|
|                              | Yes                 | No |           |             |             |       |
| PCT > 0.5 ng/mL              | 33                  | 1  | 0.68      | 0.717       | 0.750       | 2.870 |
| 0.25 ng/mL < PCT ≤ 0.5 ng/mL | 6                   | 1  | 0.14      | 0.130       | 0.750       | 0.522 |
| 0.1 ng/mL < PCT ≤ 0.25 ng/mL | 7                   | 2  | 0.18      | 0.848       | 0.500       | 0.304 |
| PCT ≤ 0.1 ng/mL              | 0                   | 0  | 0         | 1.000       | 0.000       | NaN   |

### Cohort A + Crossover Cohort

|                              | Bacterial infection |    | % in band | Sensitivity | Specificity | LR    |
|------------------------------|---------------------|----|-----------|-------------|-------------|-------|
|                              | Yes                 | No |           |             |             |       |
| PCT > 0.5 ng/mL              | 40                  | 3  | 0.705     | 0.727       | 0.500       | 1.455 |
| 0.25 ng/mL < PCT ≤ 0.5 ng/mL | 8                   | 1  | 0.148     | 0.145       | 0.833       | 0.873 |
| 0.1 ng/mL < PCT ≤ 0.25 ng/mL | 7                   | 2  | 0.148     | 0.873       | 0.333       | 0.382 |
| PCT ≤ 0.1 ng/mL              | 0                   | 0  | 0         | 1.000       | 0.000       | NaN   |

### Crossover Cohort

|                              | Bacterial infection |    | % in band | Sensitivity | Specificity | LR    |
|------------------------------|---------------------|----|-----------|-------------|-------------|-------|
|                              | Yes                 | No |           |             |             |       |
| PCT > 0.5 ng/mL              | 7                   | 2  | 0.818     | 0.778       | 0           | 0.778 |
| 0.25 ng/mL < PCT ≤ 0.5 ng/mL | 2                   | 0  | 0.182     | 0.222       | 1           | Inf   |
| 0.1 ng/mL < PCT ≤ 0.25 ng/mL | 0                   | 0  | 0         | 1           | 0           | -     |
| PCT ≤ 0.1 ng/mL              | 0                   | 0  | 0         | 1           | 0           | -     |



**A(3)****IL-6****Total Subjects**

|                               | Bacterial infection |    | % in band | Sensitivity | Specificity | LR    |
|-------------------------------|---------------------|----|-----------|-------------|-------------|-------|
|                               | Yes                 | No |           |             |             |       |
| IL-6 > 35 pg/mL               | 46                  | 91 | 0.706     | 0.836       | 0.345       | 1.278 |
| 10.5 pg/mL < IL-6 ≤ 35 pg/mL  | 9                   | 42 | 0.263     | 0.164       | 0.698       | 0.542 |
| 1.8 pg/mL < IL-6 ≤ 10.5 pg/mL | 0                   | 6  | 0.031     | 1.000       | 0.043       | 0.000 |
| IL-6 ≤ 1.8 pg/mL              | 0                   | 0  | 0         | 1.000       | 0.000       | NaN   |

**Cohort A**

|                               | Bacterial infection |    | % in band | Sensitivity | Specificity | LR    |
|-------------------------------|---------------------|----|-----------|-------------|-------------|-------|
|                               | Yes                 | No |           |             |             |       |
| IL-6 > 35 pg/mL               | 41                  | 3  | 0.88      | 0.891       | 0.250       | 1.188 |
| 10.5 pg/mL < IL-6 ≤ 35 pg/mL  | 5                   | 1  | 0.12      | 0.109       | 0.750       | 0.435 |
| 1.8 pg/mL < IL-6 ≤ 10.5 pg/mL | 0                   | 0  | 0         | 1.000       | 0.000       | NaN   |
| IL-6 ≤ 1.8 pg/mL              | 0                   | 0  | 0         | 1.000       | 0.000       | NaN   |

**Cohort A + Crossover Cohort**

|                               | Bacterial infection |    | % in band | Sensitivity | Specificity | LR    |
|-------------------------------|---------------------|----|-----------|-------------|-------------|-------|
|                               | Yes                 | No |           |             |             |       |
| IL-6 > 35 pg/mL               | 46                  | 5  | 0.836     | 0.836       | 0.167       | 1.004 |
| 10.5 pg/mL < IL-6 ≤ 35 pg/mL  | 9                   | 1  | 0.164     | 0.164       | 0.833       | 0.982 |
| 1.8 pg/mL < IL-6 ≤ 10.5 pg/mL | 0                   | 0  | 0         | 1.000       | 0.000       | NaN   |
| IL-6 ≤ 1.8 pg/mL              | 0                   | 0  | 0         | 1.000       | 0.000       | NaN   |

**Crossover Cohort**

|                               | Bacterial infection |    | % in band | Sensitivity | Specificity | LR    |
|-------------------------------|---------------------|----|-----------|-------------|-------------|-------|
|                               | Yes                 | No |           |             |             |       |
| IL-6 > 35 pg/mL               | 5                   | 2  | 0.636     | 0.556       | 0           | 0.556 |
| 10.5 pg/mL < IL-6 ≤ 35 pg/mL  | 4                   | 0  | 0.364     | 0.444       | 1           | Inf   |
| 1.8 pg/mL < IL-6 ≤ 10.5 pg/mL | 0                   | 0  | 0         | 1           | 0           | -     |
| IL-6 ≤ 1.8 pg/mL              | 0                   | 0  | 0         | 1           | 0           | -     |

**A(4)****CRP****Total Subjects**

|                         | Bacterial infection |    | % in band | Sensitivity | Specificity | LR    |
|-------------------------|---------------------|----|-----------|-------------|-------------|-------|
|                         | Yes                 | No |           |             |             |       |
| CRP > 40 mg/L           | 43                  | 8  | 0.911     | 0.977       | 0.333       | 1.466 |
| 20 mg/L < CRP ≤ 40 mg/L | 1                   | 3  | 0.071     | 0.023       | 0.750       | 0.091 |
| 10 mg/L < CRP ≤ 20 mg/L | 0                   | 0  | 0         | 1.000       | 0.000       | NaN   |
| CRP ≤ 10 mg/L           | 0                   | 1  | 0.018     | 1.000       | 0.083       | 0.000 |

**Cohort A**

|                         | Bacterial infection |    | % in band | Sensitivity | Specificity | LR    |
|-------------------------|---------------------|----|-----------|-------------|-------------|-------|
|                         | Yes                 | No |           |             |             |       |
| CRP > 40 mg/L           | 37                  | 4  | 0.953     | 0.974       | 0.200       | 1.217 |
| 20 mg/L < CRP ≤ 40 mg/L | 1                   | 1  | 0.047     | 0.026       | 0.800       | 0.132 |
| 10 mg/L < CRP ≤ 20 mg/L | 0                   | 0  | 0         | 1.000       | 0.000       | NaN   |
| CRP ≤ 10 mg/L           | 0                   | 0  | 0         | 1.000       | 0.000       | NaN   |

**Cohort A + Crossover Cohort**

|                         | Bacterial infection |    | % in band | Sensitivity | Specificity | LR    |
|-------------------------|---------------------|----|-----------|-------------|-------------|-------|
|                         | Yes                 | No |           |             |             |       |
| CRP > 40 mg/L           | 43                  | 5  | 0.96      | 0.977       | 0.167       | 1.173 |
| 20 mg/L < CRP ≤ 40 mg/L | 1                   | 1  | 0.04      | 0.023       | 0.833       | 0.136 |
| 10 mg/L < CRP ≤ 20 mg/L | 0                   | 0  | 0         | 1.000       | 0.000       | NaN   |
| CRP ≤ 10 mg/L           | 0                   | 0  | 0         | 1.000       | 0.000       | NaN   |

**Crossover Cohort**

|                         | Bacterial infection |    | % in band | Sensitivity | Specificity | LR    |
|-------------------------|---------------------|----|-----------|-------------|-------------|-------|
|                         | Yes                 | No |           |             |             |       |
| CRP > 40 mg/L           | 6                   | 1  | 1         | 1.000       | 0.000       | 1.000 |
| 20 mg/L < CRP ≤ 40 mg/L | 0                   | 0  | 0         | 0.000       | 1.000       | NaN   |
| 10 mg/L < CRP ≤ 20 mg/L | 0                   | 0  | 0         | 1.000       | 0.000       | NaN   |
| CRP ≤ 10 mg/L           | 0                   | 0  | 0         | 1.000       | 0.000       | NaN   |

**A(5)**

## **WBC (drawn standard of care)**

### **Total Subjects**

|                                                             | Bacterial infection |    | % in band | Sensitivity | Specificity | LR    |
|-------------------------------------------------------------|---------------------|----|-----------|-------------|-------------|-------|
|                                                             | Yes                 | No |           |             |             |       |
| WBC > 20K cells/mm <sup>3</sup>                             | 14                  | 15 | 0.154     | 0.264       | 0.889       | 2.377 |
| 15K cells/mm <sup>3</sup> < WBC ≤ 20K cells/mm <sup>3</sup> | 17                  | 22 | 0.207     | 0.321       | 0.837       | 1.968 |
| 11K cells/mm <sup>3</sup> < WBC ≤ 15K cells/mm <sup>3</sup> | 10                  | 37 | 0.25      | 0.811       | 0.274       | 0.688 |
| WBC ≤ 11K cells/mm <sup>3</sup>                             | 12                  | 61 | 0.388     | 0.774       | 0.452       | 0.501 |

### **Cohort A**

|                                                             | Bacterial infection |    | % in band | Sensitivity | Specificity | LR    |
|-------------------------------------------------------------|---------------------|----|-----------|-------------|-------------|-------|
|                                                             | Yes                 | No |           |             |             |       |
| WBC > 20K cells/mm <sup>3</sup>                             | 13                  | 0  | 0.255     | 0.283       | 1.000       | Inf   |
| 15K cells/mm <sup>3</sup> < WBC ≤ 20K cells/mm <sup>3</sup> | 13                  | 1  | 0.275     | 0.283       | 0.800       | 1.413 |
| 11K cells/mm <sup>3</sup> < WBC ≤ 15K cells/mm <sup>3</sup> | 9                   | 0  | 0.176     | 0.804       | 0.000       | Inf   |
| WBC ≤ 11K cells/mm <sup>3</sup>                             | 11                  | 4  | 0.294     | 0.761       | 0.800       | 0.299 |

### **Cohort A + Crossover Cohort**

|                                                             | Bacterial infection |    | % in band | Sensitivity | Specificity | LR    |
|-------------------------------------------------------------|---------------------|----|-----------|-------------|-------------|-------|
|                                                             | Yes                 | No |           |             |             |       |
| WBC > 20K cells/mm <sup>3</sup>                             | 14                  | 0  | 0.237     | 0.264       | 1.000       | Inf   |
| 15K cells/mm <sup>3</sup> < WBC ≤ 20K cells/mm <sup>3</sup> | 17                  | 1  | 0.305     | 0.321       | 0.833       | 1.925 |
| 11K cells/mm <sup>3</sup> < WBC ≤ 15K cells/mm <sup>3</sup> | 10                  | 0  | 0.169     | 0.811       | 0.000       | Inf   |
| WBC ≤ 11K cells/mm <sup>3</sup>                             | 12                  | 5  | 0.288     | 0.774       | 0.833       | 0.272 |

### **Crossover Cohort**

|                                                             | Bacterial infection |    | % in band | Sensitivity | Specificity | LR    |
|-------------------------------------------------------------|---------------------|----|-----------|-------------|-------------|-------|
|                                                             | Yes                 | No |           |             |             |       |
| WBC > 20K cells/mm <sup>3</sup>                             | 1                   | 0  | 0.125     | 0.143       | 1.000       | Inf   |
| 15K cells/mm <sup>3</sup> < WBC ≤ 20K cells/mm <sup>3</sup> | 4                   | 0  | 0.5       | 0.571       | 1.000       | Inf   |
| 11K cells/mm <sup>3</sup> < WBC ≤ 15K cells/mm <sup>3</sup> | 1                   | 0  | 0.125     | 0.857       | 0.000       | Inf   |
| WBC ≤ 11K cells/mm <sup>3</sup>                             | 1                   | 1  | 0.25      | 0.857       | 1.000       | 0.143 |

A(6)

## PMN:ALC (from CBC, drawn standard of care)

### Total Subjects

|                | Bacterial infection |    | % in band | Sensitivity | Specificity | LR    |
|----------------|---------------------|----|-----------|-------------|-------------|-------|
|                | Yes                 | No |           |             |             |       |
| Ratio > 18     | 13                  | 4  | 0.179     | 0.260       | 0.911       | 2.925 |
| 9 < Ratio ≤ 18 | 26                  | 15 | 0.432     | 0.520       | 0.667       | 1.560 |
| 6 < Ratio ≤ 9  | 7                   | 12 | 0.2       | 0.860       | 0.267       | 0.525 |
| Ratio ≤ 6      | 4                   | 14 | 0.189     | 0.920       | 0.311       | 0.257 |

### Cohort A

|                | Bacterial infection |    | % in band | Sensitivity | Specificity | LR    |
|----------------|---------------------|----|-----------|-------------|-------------|-------|
|                | Yes                 | No |           |             |             |       |
| Ratio > 18     | 13                  | 0  | 0.277     | 0.302       | 1.000       | Inf   |
| 9 < Ratio ≤ 18 | 20                  | 1  | 0.447     | 0.465       | 0.750       | 1.860 |
| 6 < Ratio ≤ 9  | 6                   | 0  | 0.128     | 0.860       | 0.000       | Inf   |
| Ratio ≤ 6      | 4                   | 3  | 0.149     | 0.907       | 0.750       | 0.124 |

### Cohort A + Crossover Cohort

|                | Bacterial infection |    | % in band | Sensitivity | Specificity | LR    |
|----------------|---------------------|----|-----------|-------------|-------------|-------|
|                | Yes                 | No |           |             |             |       |
| Ratio > 18     | 13                  | 0  | 0.236     | 0.260       | 1.000       | Inf   |
| 9 < Ratio ≤ 18 | 26                  | 1  | 0.491     | 0.520       | 0.800       | 2.600 |
| 6 < Ratio ≤ 9  | 7                   | 0  | 0.127     | 0.860       | 0.000       | Inf   |
| Ratio ≤ 6      | 4                   | 4  | 0.145     | 0.920       | 0.800       | 0.100 |

### Crossover Cohort

|                | Bacterial infection |    | % in band | Sensitivity | Specificity | LR    |
|----------------|---------------------|----|-----------|-------------|-------------|-------|
|                | Yes                 | No |           |             |             |       |
| Ratio > 18     | 0                   | 0  | 0         | 0.000       | 1.000       | NaN   |
| 9 < Ratio ≤ 18 | 6                   | 0  | 0.75      | 0.857       | 1.000       | Inf   |
| 6 < Ratio ≤ 9  | 1                   | 0  | 0.125     | 0.857       | 0.000       | Inf   |
| Ratio ≤ 6      | 0                   | 1  | 0.125     | 1.000       | 1.000       | 0.000 |

CBC, complete blood cell count with differential; PMN, polymorphonuclear leukocytes; ALC, absolute lymphocyte count.

**B**

# IMX-SEV-3

## Total Subjects

|                   | 30-day mortality |     | % in band | Sensitivity | Specificity | LR    |
|-------------------|------------------|-----|-----------|-------------|-------------|-------|
|                   | Yes              | No  |           |             |             |       |
| High severity     | 8                | 15  | 0.117     | 0.571       | 0.918       | 6.971 |
| Moderate severity | 6                | 151 | 0.797     | 0.429       | 0.175       | 0.519 |
| Low severity      | 0                | 17  | 0.086     | 1.000       | 0.093       | 0.000 |

## Cohort A

|                   | 30-day mortality |    | % in band | Sensitivity | Specificity | LR    |
|-------------------|------------------|----|-----------|-------------|-------------|-------|
|                   | Yes              | No |           |             |             |       |
| High severity     | 6                | 10 | 0.314     | 0.750       | 0.767       | 3.225 |
| Moderate severity | 2                | 32 | 0.667     | 0.250       | 0.256       | 0.336 |
| Low severity      | 0                | 1  | 0.020     | 1.000       | 0.023       | 0.000 |

## Cohort B

|                   | 30-day mortality |     | % in band | Sensitivity | Specificity | LR    |
|-------------------|------------------|-----|-----------|-------------|-------------|-------|
|                   | Yes              | No  |           |             |             |       |
| High severity     | 1                | 4   | 0.037     | 0.250       | 0.969       | 8.187 |
| Moderate severity | 3                | 111 | 0.844     | 0.750       | 0.153       | 0.885 |
| Low severity      | 0                | 16  | 0.119     | 1.000       | 0.122       | 0.000 |

## Cohort A + Crossover Cohort

|                   | 30-day mortality |    | % in band | Sensitivity | Specificity | LR    |
|-------------------|------------------|----|-----------|-------------|-------------|-------|
|                   | Yes              | No |           |             |             |       |
| High severity     | 7                | 11 | 0.290     | 0.700       | 0.788       | 3.309 |
| Moderate severity | 3                | 40 | 0.694     | 0.300       | 0.231       | 0.390 |
| Low severity      | 0                | 1  | 0.016     | 1.000       | 0.019       | 0.000 |

## Crossover Cohort

|                   | 30-day mortality |    | % in band | Sensitivity | Specificity | LR    |
|-------------------|------------------|----|-----------|-------------|-------------|-------|
|                   | Yes              | No |           |             |             |       |
| High severity     | 1                | 1  | 0.182     | 0.500       | 0.889       | 4.500 |
| Moderate severity | 1                | 8  | 0.818     | 0.500       | 0.111       | 0.562 |
| Low severity      | 0                | 0  | 0.000     | 1.000       | 0.000       | NaN   |

**eFigure 3. Linear Mixed-Effects Modeling of IMX-BVN-3 Scores Over Time in the Patients With Sepsis (Cohort A [Blue]) and Patients at Risk of Sepsis (Cohort B [Red])**

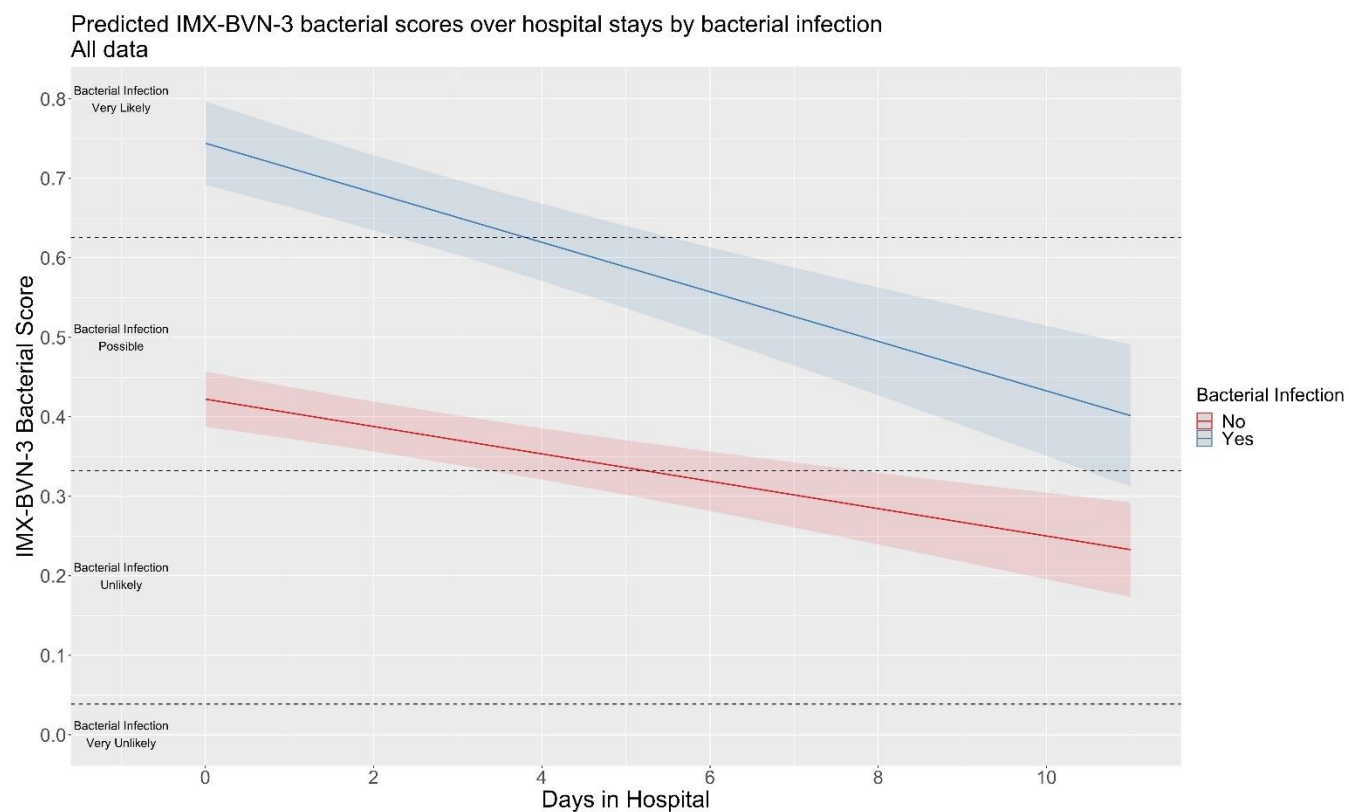

**eFigure 4. Linear Mixed-Effects Modeling of IMX-SEV-3 Scores in Patients With Those Dead (Blue Lines) and Alive (Red Lines) at 30 Days**

Initial severity scores were greater among patients who suffered 30-day mortality ( $p < 0.00001$ ). Severity scores increased over time in both groups, consistent with early discharge for surviving patients, whose data were subsequently censored. Data is represented as a linear mixed effects model.

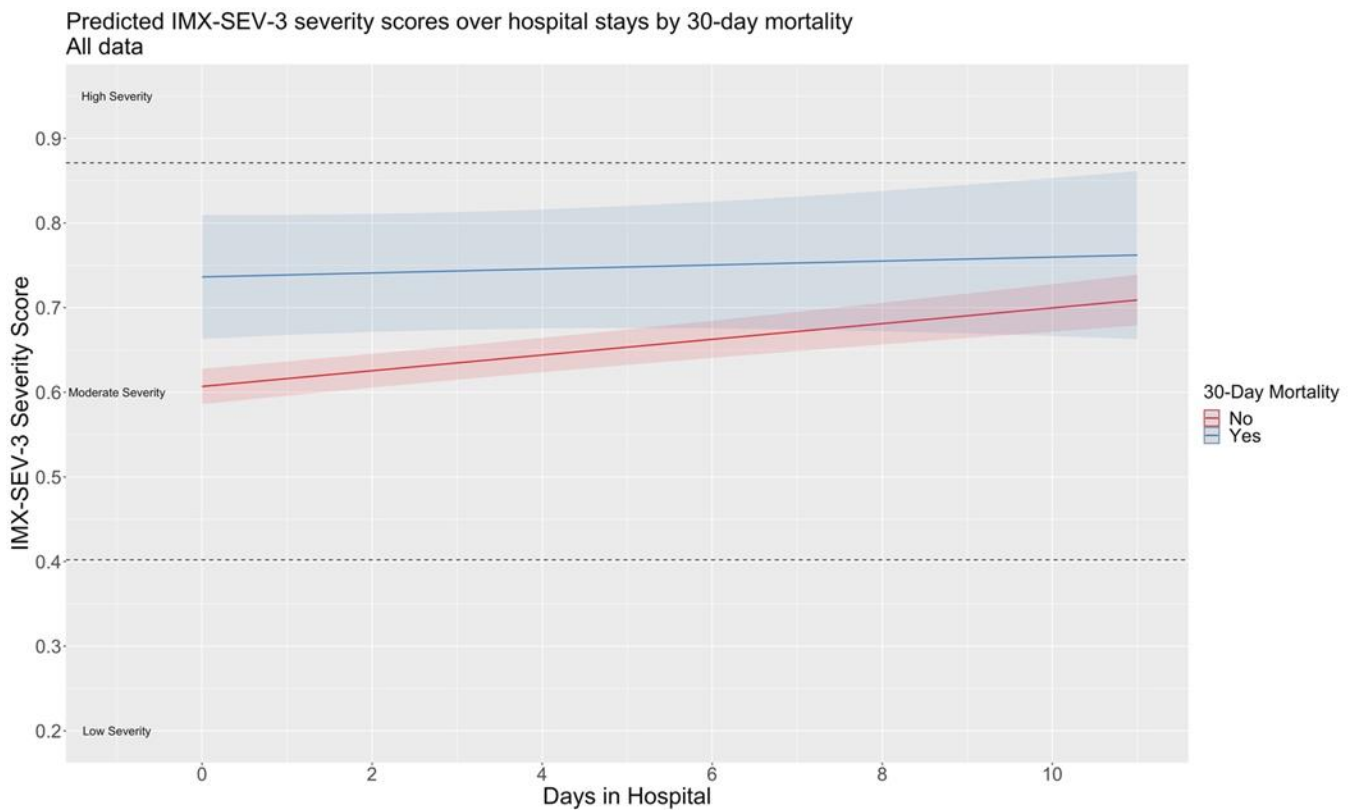



**eFigure 5. A Framework for Using IMX-SEV-3 Severity Scores to Further Stratify Risk for 30-day Mortality**

Patients were stratified initially by sequential organ failure assessment (SOFA) score cutoffs and then by IMX-SEV-3 severity scores indicating that 30-day mortality was “high”, “moderate”, and “low”.

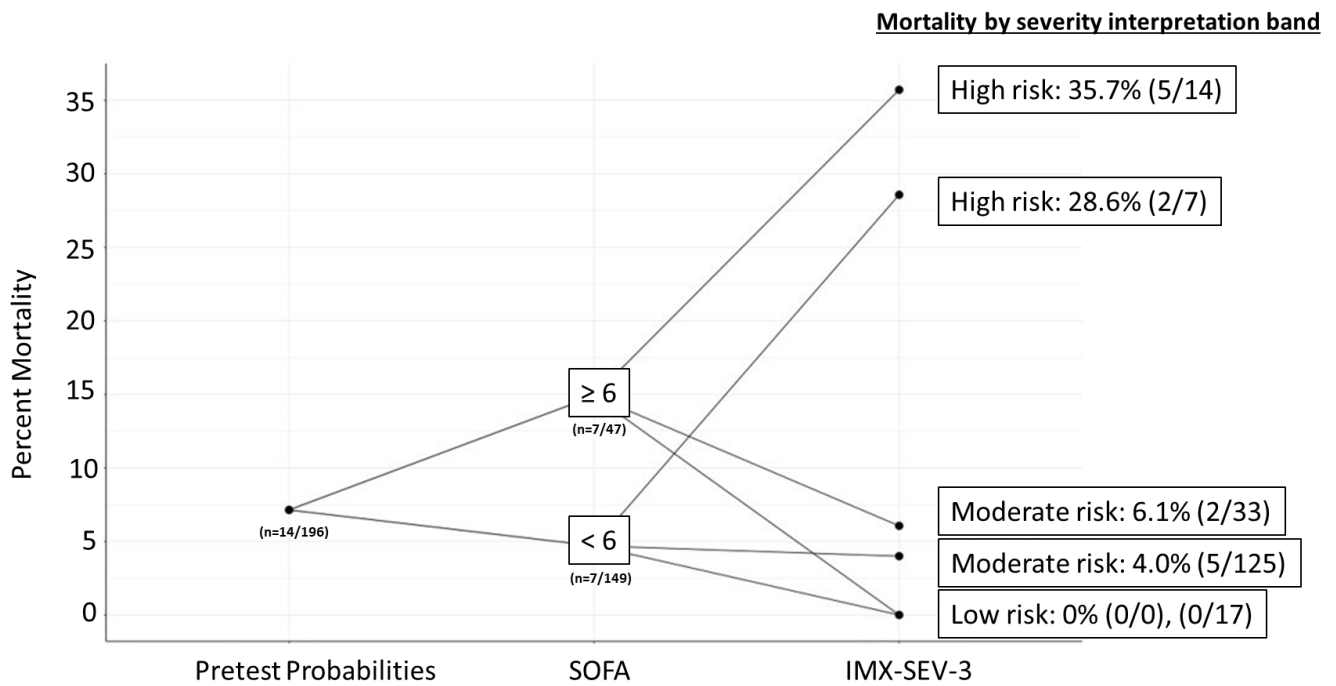

**eTable 3. Spearman Correlation Coefficients for the Total Cohort at Day 0 and Total Samples**

**Day 0 n=200**

|                            | <b>BVN-3<br/>bacterial</b> | <b>BVN-3<br/>viral</b> | <b>SEV-3<br/>severity</b> | <b>IL6</b> | <b>PCT</b> | <b>SOFA</b> |
|----------------------------|----------------------------|------------------------|---------------------------|------------|------------|-------------|
| <b>BVN-3<br/>bacterial</b> | 1                          |                        |                           |            |            |             |
| <b>BVN-3 viral</b>         | -0.36                      | 1                      |                           |            |            |             |
| <b>SEV-3<br/>severity</b>  | 0.54                       | -0.61                  | 1                         |            |            |             |
| <b>IL6</b>                 | 0.38                       | -0.49                  | 0.42                      | 1          |            |             |
| <b>PCT</b>                 | 0.55                       | -0.4                   | 0.58                      | 0.52       | 1          |             |
| <b>SOFA</b>                | 0.26                       | -0.3                   | 0.39                      | 0.34       | 0.32       | 1           |

All values are  $p < 0.0001$

A univariable logistic regression model using procalcitonin alone to predict infection had AUROC of 0.85 (0.80 - 0.91), whereas a multivariable model using procalcitonin plus the IMX-BVN-3 bacterial score had AUROC 0.87 (0.81 - 0.92), which was not significantly greater than procalcitonin alone ( $p=0.596$ ). A univariable logistic regression model using SOFA alone to predict 30-day mortality had AUROC 0.77 (0.63 - 0.90). A multivariable model using SOFA plus the IMX-SEV-3 severity score had AUROC 0.83 (0.70 - 0.97), which was not significantly greater than SOFA alone ( $p=0.092$ ). This is not surprising, since correlation coefficients among the different biomarkers, including IMX-SEV-3, and SOFA scores were all highly significant ( $p < 0.001$ ).
